# Supplementary material
Source: PubMed Central journal article supplement (PMC4366944)
Supplement: NIHMS492135-supplement-sup_table_1.pdf [file NIHMS492135-supplement-sup_table_1.pdf]

Table S1. group medians and interquartile ranges of GEPCI metrics and LL-FLAIR

|                        | All subjects. Median (quartiles) | RRMS. Median (quartiles) | PPMS. median (quartiles) | SPMS. Median (quartiles) |
|------------------------|----------------------------------|--------------------------|--------------------------|--------------------------|
| TDL (mm <sup>3</sup> ) | 1434 (837 to 2038)               | 1062 (704 to 1674)       | 953 (518 to 2060)        | 1748 (1491 to 3524)      |
| LL (mm <sup>3</sup> )  | 3458 (2165 to 5136)              | 2921 (1688 to 4713)      | 2572 (1583 to 4864)      | 4111 (3379 to 8014)      |
| MTDS                   | 0.39 (0.34 to 0.45)              | 0.36 (0.31 to 0.43)      | 0.37 (0.31 to 0.46)      | 0.43 (0.41 to 0.49)      |
| width                  | 4.99 (4.41 to 5.89)              | 4.65 (4.3 to 5.7)        | 4.51 (4.34 to 5.48)      | 5.51 (4.91 to 6.31)      |
| center                 | 19.77 (19.02 to 20.66)           | 19.78 (19.36 to 20.68)   | 19.77 (18.79 to 20.52)   | 19.66 (18.4 to 20.68)    |
| w/c                    | 0.25 (0.22 to 0.30)              | 0.24 (0.22 to 0.31)      | 0.23 (0.22 to 0.28)      | 0.29 (0.26 to 0.31)      |
| LL-FLAIR               | 5467 (1907 to 8801)              | 4367 (1383 to 8037)      | 3438 (1189 to 7743)      | 8426 (5283 to 12676)     |
